# Supplementary material
Source: publisher figshare collection journal article supplement (https://tandf.figshare.com/ndownloader/files/17837705)
Supplement: Supplementary file 1 [file 17837705]

## Supplementary Materials

**Table 1.** Summary statistics of explanatory indicators for Malawi and Peru

|                                                         | Malawi               | Peru                | Min | Max |
|---------------------------------------------------------|----------------------|---------------------|-----|-----|
| Human recognition censored count                        | 0.331***<br>(0.004)  | 0.191***<br>(0.003) | 0   | 1   |
| Agriculture: Partner                                    | 0.489***<br>(0.003)  | 0.339***<br>(0.004) | 0   | 1   |
| Agriculture: Woman                                      | 0.469***<br>(0.004)  | 0.362***<br>(0.004) | 0   | 1   |
| Head household: Woman                                   | 0.100***<br>(0.002)  | 0.077***<br>(0.002) | 0   | 1   |
| Spouse/partner age                                      | 34.1***<br>(0.084)   | 38.2***<br>(0.060)  | 15  | 80  |
| Woman's Age                                             | 29.3***<br>(0.069)   | 34.4***<br>(0.058)  | 15  | 49  |
| Wealth Index - poorest                                  | 0.170***<br>(0.003)  | 0.193***<br>(0.003) | 0   | 1   |
| - poorer                                                | 0.224***<br>(0.004)  | 0.264***<br>(0.004) | 0   | 1   |
| - middle                                                | 0.228***<br>(0.003)  | 0.249***<br>(0.004) | 0   | 1   |
| - richer                                                | 0.206***<br>(0.004)  | 0.171***<br>(0.003) | 0   | 1   |
| Spouse/partner Education                                | 6.40***<br>(0.031)   | 9.08***<br>(0.030)  | 0   | 17  |
| Women' Education                                        | 4.70***<br>(0.033)   | 8.44***<br>(0.035)  | 0   | 17  |
| Household owns agricultural land                        | 0.794***<br>(0.003)  | 0.407***<br>(0.004) | 0   | 1   |
| Household owns agricultural land...× Agriculture: Woman | 0.412***<br>(0.003)  | 0.276***<br>(0.004) | 0   | 1   |
| × Agriculture: Man                                      | 0.432***<br>(0.003)  | 0.243***<br>(0.004) | 0   | 1   |
| × woman's education                                     | 3.43***<br>(0.030)   | 2.54***<br>(0.030)  | 0   | 17  |
| × partner's education                                   | 4.78***<br>(0.032)   | 3.07***<br>(0.035)  | 0   | 17  |
| Agriculture: Woman × woman's education                  | 1.87***<br>(0.022)   | 1.94***<br>(0.029)  | 0   | 17  |
| Woman's education^2                                     | 35.3***<br>(0.389)   | 91.8***<br>(0.630)  | 0   | 289 |
| Household size                                          | 4.86***<br>(0.016)   | 4.57***<br>(0.013)  | 1   | 10  |
| Polygamy                                                | 0.142***<br>(0.003)  |                     | 0   | 1   |
| Woman is Muslim                                         | 0.140***<br>(0.0026) |                     | 0   | 1   |
| Rural                                                   | 0.865***<br>(0.003)  | 0.433***<br>(0.004) | 0   | 1   |
| No. older siblings                                      | 2.51***<br>(0.017)   | 2.90***<br>(0.018)  | 0   | 10  |
| Married more than once                                  | 1.22***<br>(0.004)   | 1.09***<br>(0.002)  | 1   | 2   |
| First child is female                                   | 0.463***<br>(0.003)  | 0.472***<br>(0.004) | 0   | 1   |
| First & second children: female                         | 0.189***<br>(0.003)  | 0.176***<br>(0.003) | 0   | 1   |
| Alcoholic partner/spouse                                | 0.339***<br>(0.003)  | 0.764***<br>(0.003) | 0   | 1   |
| Woman's physical retaliatory behavior                   | 0.029***<br>(0.001)  | 0.081***<br>(0.002) | 0   | 1   |
| Work enumeration – Cash and kind                        | 0.463***             | 0.082***            | 0   | 1   |

|                     |         |         |
|---------------------|---------|---------|
|                     | (0.003) | (0.002) |
| <i>Observations</i> | 15,382  | 17,272  |

Notes: Bootstrapped standard errors in parentheses; *Significance level*: \* at 10%, \*\* at 5%, \*\*\* at 1%

**Table 2.** Percentage change in odds of human recognition deprivation in Malawi and Peru

| Percentage change in odds (%)         | Malawi   |          |          | Peru    |          |          |
|---------------------------------------|----------|----------|----------|---------|----------|----------|
|                                       | (1)      | (2)      | (3)      | (1)     | (2)      | (3)      |
| Agriculture: Partner                  | 8.6**    | 23.7**   | 14.9     | -6.2**  | -10.1    | -8.2     |
| Agriculture: Woman                    | 8.0**    | 18.7     | 21.7*    | 5.4*    | -31.5*** | -34.8*** |
| Head household: Woman                 | -27.2*** | -30.5*** | -27.6*** | 29.2*** | 15.9**   | 11.5     |
| Spouse/partner's age                  | 0.2      | 0.0      | -0.0     | 0.1     | 0.7*     | 0.8**    |
| Woman's age                           | -1.8***  | -2.1***  | -2.1***  | 1.1***  | -0.5     | -0.5     |
| Wealth index-poorest                  | 11.7     | -9.6     | -12.2    | 28.8*** | 66.6***  | 74.0***  |
| -poorer                               | 16.8**   | -0.6     | -1.5     | 70.0*** | 81.7***  | 73.4***  |
| -middle                               | 18.5***  | 4.5      | 1.5      | 81.6*** | 80.6***  | 71.1***  |
| -richer                               | 15.9**   | 5.7      | 3.7      | 55.2*** | 49.9***  | 45.4***  |
| Spouse/partner's education            | -1.0*    | -3.2**   | -2.8**   | -0.7*   | -3.2***  | -4.1***  |
| Woman's education                     | 0.1      | 4.3*     | 3.3      | -3.8*** | 0.0      | 0.5      |
| Household owns agricultural land      | -        | -17.7    | -7.3     |         | -25.2*   | -30.8**  |
| Household owns agricultural land...   |          |          |          |         |          |          |
| × Agriculture: Woman                  | -        | -7.1     | -8.1     |         | -6.5     | -1.1     |
| × Agriculture: Man                    | -        | -15.8    | -16.5*   |         | 9.4      | 9.1      |
| × woman's education                   | -        | 1.0      | 1.0      |         | -1.2     | -1.7     |
| × partner's education                 | -        | 2.7      | 1.8      |         | 3.0**    | 3.3***   |
| Agriculture: Woman ...                |          |          |          |         |          |          |
| × woman's education                   | -        | -0.1     | -0.8     |         | 1.3      | 1.3      |
| Woman's education^2                   | -        | -0.5***  | -0.5***  |         | -0.2**   | -0.3**   |
| Household size                        | -        | -1.1     | -2.3**   |         | 4.5***   | 5.1***   |
| Polygamy                              | -        | 27.4***  | 19.4***  |         | -        | -        |
| Woman is Muslim                       | -        | -37.4*** | -20.3*** |         | -        | -        |
| Rural                                 | -        | 5.3      | 8.7      |         | -8.6     | -11.7**  |
| No. of older siblings                 | -        | 1.3      | 1.2      |         | 0.6      | 0.9      |
| Married more than once                | -        | 22.5***  | 26***    |         | 187.0*** | 199.6*** |
| First child is female                 | -        | 2.5      | 3.3      |         | -8.0*    | -8.2*    |
| First & second children: female       | -        | -6.9     | -7.9     |         | 12.1*    | 11.5*    |
| Alcoholic spouse/partner              | -        | 43.3***  | 40.4***  |         | 78.8***  | 71.9***  |
| Woman's physical retaliatory behavior | -        | 239.0*** | 248.5*** |         | 96.2***  | 90.9***  |
| Work remuneration – cash and kind     | -        | 28.7***  | 23.8***  |         | -2.5     | -1.2     |
| Time Controls                         | Yes      | Yes      | Yes      | Yes     | Yes      | Yes      |
| Time×Occupation                       |          | Yes      | Yes      |         | Yes      | Yes      |
| Ethnicity controls                    |          |          | Yes      |         |          | Yes      |
| Country Fixed Effects                 |          |          | Yes      |         |          | Yes      |
| Observations                          | 16,112   | 15,382   | 15,382   | 54,967  | 17,272   | 17,272   |

Notes: Significance level: \* at 10%, \*\* at 5%, \*\*\* at 1%; For robust standard errors and coefficients, see Table 1 in main paper.

**Table 3.** Full model marginal effects on recognition deprivation censored count

|                                                          | Malawi    | Peru      |
|----------------------------------------------------------|-----------|-----------|
|                                                          | (3)       | (3)       |
| Agriculture: Partner                                     | 0.029     | -0.012    |
| Agriculture: Woman                                       | 0.040*    | -0.061*** |
| Head household: Woman                                    | -0.067*** | 0.016     |
| Partner/spouse age                                       | -0.000    | 0.001**   |
| Woman's age                                              | -0.004*** | -0.001    |
| Wealth Index - poorest                                   | -0.027    | 0.079***  |
| - poorer                                                 | -0.003    | 0.079***  |
| - middle                                                 | 0.003     | 0.077***  |
| - richer                                                 | 0.008     | 0.054***  |
| Partner/spouse education                                 | -0.006**  | -0.006*** |
| Woman's education                                        | 0.007     | 0.001     |
| Household owns agricultural land                         | -0.016    | -0.053**  |
| Household owns agricultural land    × Agriculture: Woman | -0.017    | -0.002    |
| × Agriculture: Man                                       | -0.037*   | 0.013     |
| × woman's education                                      | 0.002     | -0.003    |
| × partner education                                      | 0.004     | 0.005**   |
| Agriculture: Woman x woman's education                   | -0.002    | 0.002     |
| Women's education^2                                      | -0.001*** | -0.000**  |
| Household size                                           | -0.005**  | 0.007***  |
| Polygamy                                                 | 0.037***  | -         |
| Woman is Muslim                                          | -0.047*** | -         |
| Rural                                                    | 0.017     | -0.018**  |
| No. of older siblings                                    | 0.003     | 0.001     |
| Married more than once                                   | 0.048***  | 0.157***  |
| First child is female                                    | 0.007     | -0.012*   |
| First & second children: female                          | -0.017    | 0.016*    |
| Alcoholic partner/spouse                                 | 0.070***  | 0.078***  |
| Woman's physical retaliatory behavior                    | 0.257***  | 0.093***  |
| Work remuneration – cash and kind                        | 0.044***  | -0.002    |
| Observations                                             | 15,382    | 17,272    |

Notes: Robust standard errors calculated but not reported; *Significance level*: \* at 10%, \*\* at 5%, \*\*\* at 1%
